# Supplementary material
Source: PubMed Central journal article supplement (PMC1456944)
Supplement: 7601079s2.pdf [file 7601079s2.pdf]

# Supplementary Figure S1

**A**

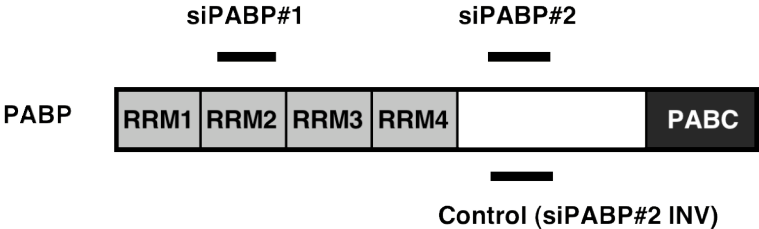

**B**

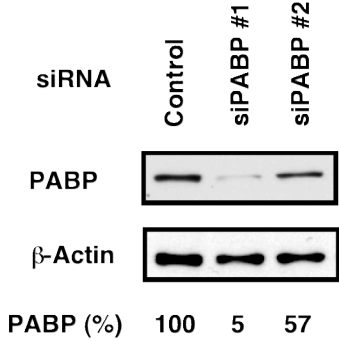

**Supplementary Figure S1. Depletion of PABP by siRNA.** (A) PABP regions targeted by three independent of siRNAs. (B) HeLa cells were transfected with control siRNA (siPABP#2 INV) or PABP siRNAs (siPABP#1 or siPABP#2). Cells were harvested 72h later, and extracts were subjected to Western blot analysis with anti-PABP antibody. As a loading control, blots were probed with anti- $\beta$ -Actin antibody. Data are expressed as the percentage of PABP amount relative to that detected that in control siRNA-transfected cells (set at 100%). The results are representative of three independent experiments.
