# Supplementary material
Source: PubMed Central journal article supplement (PMC1456944)
Supplement: 7601079s3.pdf [file 7601079s3.pdf]

## Supplementary Figure S2

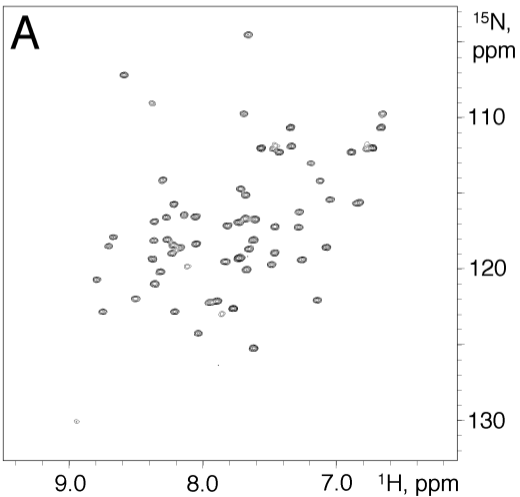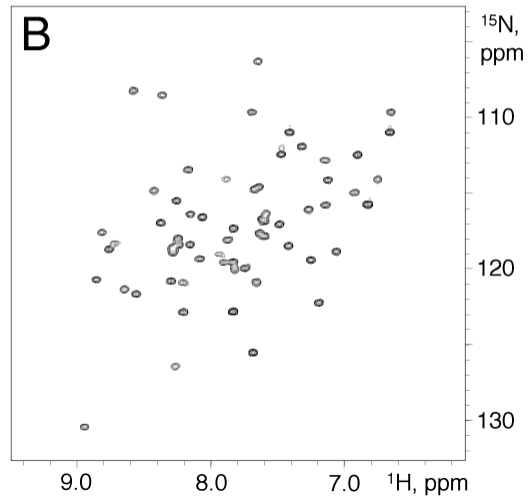

**Supplementary Figure S2.  $^1\text{H}$ - $^{15}\text{N}$  HSQC's of the PABC domain from EDD.**

(A) Unliganded  $^{15}\text{N}$ -PABC from HYD. (B) A 1:1 complex with the Paip2 peptide.
